# Supplementary material for: Localized Plasticity in the Streamlined Genomes of Vinyl Chloride Respiring Dehalococcoides
Source: PubMed Central journal article supplement (PMC2764846; doi:10.1371/journal.pgen.1000714), 2009-11-06

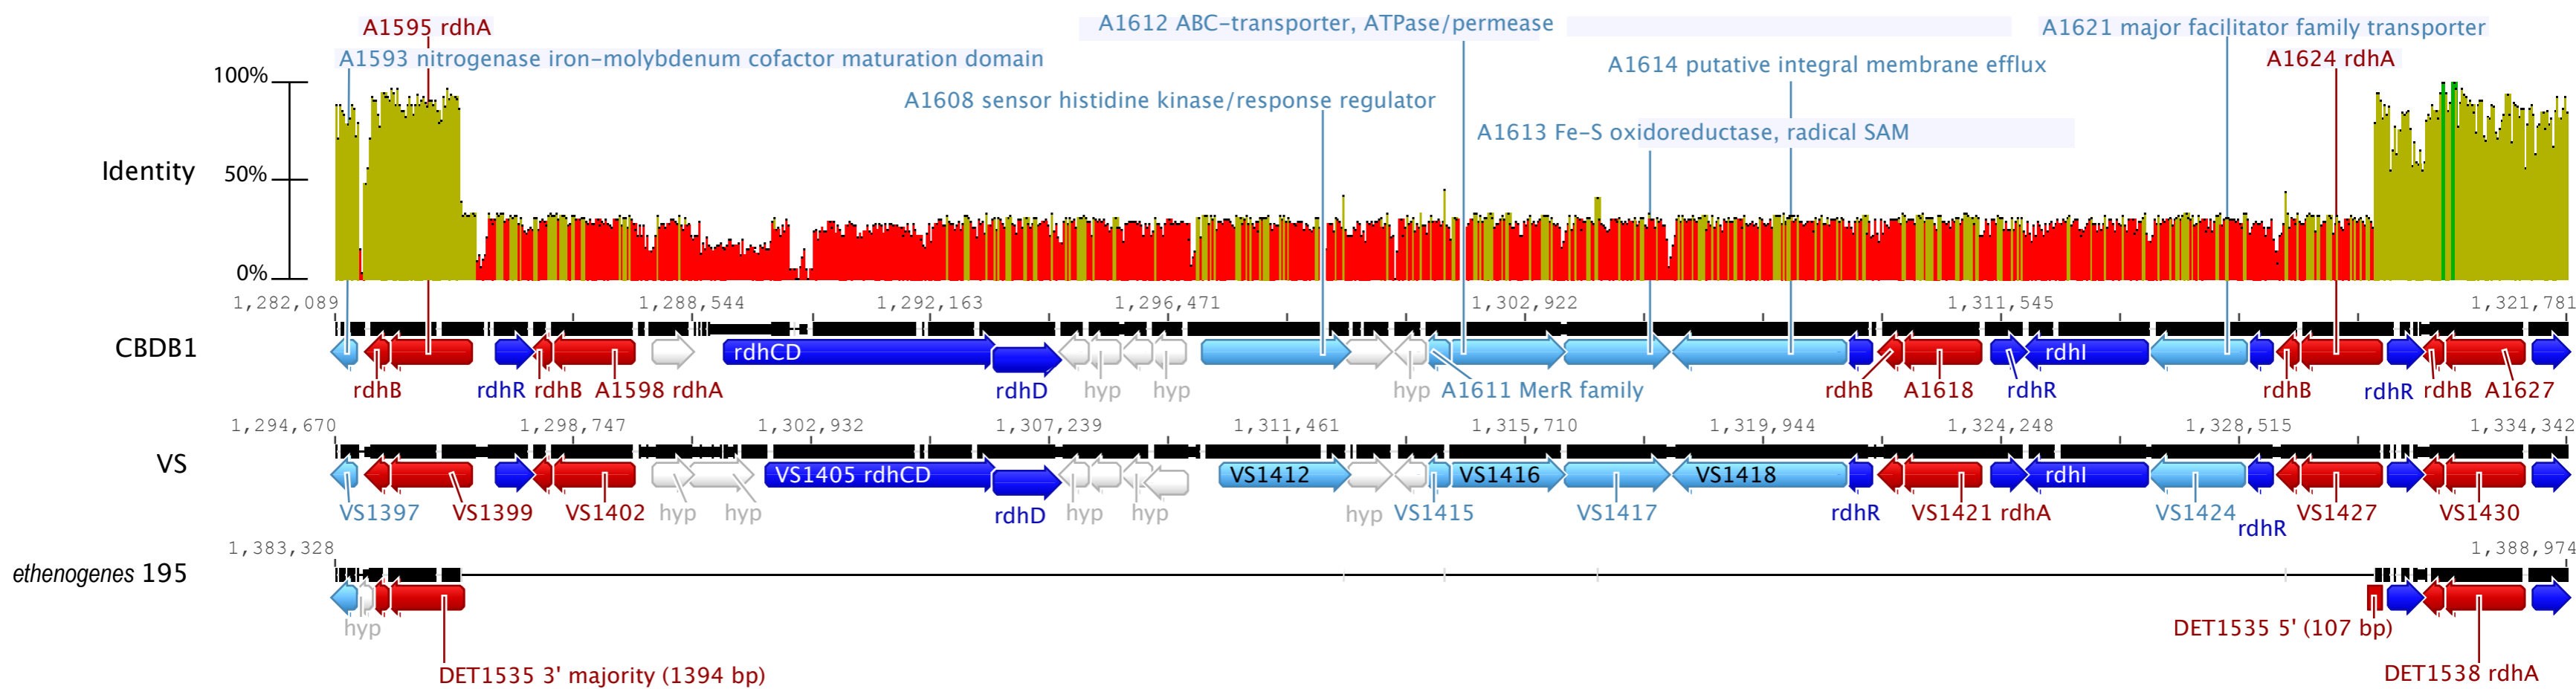

Supplement: pgen.1000714.s006.pdf [file pgen.1000714.s006.pdf]
