# Supplementary material for: Localized Plasticity in the Streamlined Genomes of Vinyl Chloride Respiring Dehalococcoides
Source: PubMed Central journal article supplement (PMC2764846; doi:10.1371/journal.pgen.1000714), 2009-11-06
Supplement: pgen.1000714.s010.pdf [file pgen.1000714.s010.pdf]

|                                                              | 195                  |         | CBDB1                |         | BAV1                 |         | VS                   |         |
|--------------------------------------------------------------|----------------------|---------|----------------------|---------|----------------------|---------|----------------------|---------|
| genome length (bp)                                           | 1469720              |         | 1395502              |         | 1341892              |         | 1413462              |         |
| %(G+C)                                                       | 48.9                 |         | 47.0                 |         | 47.2                 |         | 47.3                 |         |
| Total CDS                                                    | 1580                 |         | 1458                 |         | 1371                 |         | 1442                 |         |
| % of total CDS that are core                                 | 68.31                |         | 72.63                |         | 76.65                |         | 73.37                |         |
| total <i>rdhA</i>                                            | 17                   |         | 32                   |         | 11                   |         | 36                   |         |
| position of <i>trp</i> -region of atypically high similarity | 1338813 -<br>1362043 |         | 1137770 -<br>1165834 |         | 1243905 -<br>1267136 |         | 1150360 -<br>1177845 |         |
| Number repeated element per 10 kbps                          | 5.3                  |         | 10.2                 |         | 4.5                  |         | 6.2                  |         |
| total strain-specific CDS                                    | 360                  |         | 170                  |         | 157                  |         | 163                  |         |
| Median length of intergenic spacers                          | 34                   |         | 37                   |         | 37                   |         | 37                   |         |
| Number of Shotgun Reads                                      | 26703                |         | 23000                |         | 29941                |         | 35287                |         |
|                                                              | HPR1                 | HPR2    | HPR1                 | HPR2    | HPR1                 | HPR2    | HPR1                 | HPR2    |
| HPR start                                                    | 57857                | 1325459 | 58100                | 1137418 | 57519                | 1243554 | 57524                | 1149439 |
| HPR end                                                      | 308964               | 1423822 | 231199               | 1349625 | 312176               | 1296003 | 259060               | 1367589 |
| Number of strain-specific CDS in HPRs                        | 115                  | 37      | 31                   | 60      | 79                   | 9       | 48                   | 63      |
| <i>rdhA</i> in HPRs                                          | 9                    | 7       | 7                    | 24      | 9                    | 0       | 6                    | 30      |
| Number repeated elements per 10 kbps                         | 5.8                  | 7.3     | 11.1                 | 39.4    | 7.7                  | 4.4     | 4.8                  | 20.4    |
