# Supplementary material for: Localized Plasticity in the Streamlined Genomes of Vinyl Chloride Respiring Dehalococcoides
Source: PLoS Genet. 2009 Nov 6;5(11):e1000714. doi: 10.1371/journal.pgen.1000714 (PMC2764846; doi:10.1371/journal.pgen.1000714)
Supplement: Table S2 — Differences in predicted core metabolism between the four Dehalococcoides genomes. Each column provides the presence of a gene in the respective genome as its locus ID, or “ND” for Not Detected. A brief annotation summary is provided for each core metabolism gene group (row). (0.22 MB PDF) [file pgen.1000714.s011.pdf]

| BAV1      | CBDB1     | DET195   | VS     | Annotation                                                               |
|-----------|-----------|----------|--------|--------------------------------------------------------------------------|
| ND        | ND        | DET_0095 | ND     | ferrous iron transport protein B, FeoB                                   |
| ND        | ND        | DET_0096 | ND     | feoA family protein                                                      |
| ND        | ND        | DET_0097 | ND     | iron dependent repressor, putative                                       |
| BAV1_0151 | ND        | DET_0202 | VS190  | histidinolphosphate phosphatase family protein                           |
| BAV1_0150 | ND        | DET_0203 | VS191  | glycosyl transferase family                                              |
| BAV1_0149 | ND        | DET_0204 | ND     | NAD dependent epimerase/dehydratase                                      |
| BAV1_0148 | ND        | DET_0205 | ND     | Nucleotidyl transferase                                                  |
| BAV1_0147 | ND        | DET_0206 | ND     | GHMP kinase                                                              |
| BAV1_0146 | ND        | DET_0207 | ND     | sugar isomerase SIS                                                      |
| BAV1_0145 | ND        | DET_0208 | ND     | glycosyl transferase family 2                                            |
| BAV1_0144 | ND        | DET_0209 | ND     | hypothetical protein                                                     |
| BAV1_0143 | ND        | DET_0210 | ND     | glycosyl transferase family 2                                            |
| BAV1_0142 | ND        | DET_0211 | ND     | glycosyl transferase group 1                                             |
| BAV1_0140 | ND        | DET_0213 | ND     | hypothetical protein                                                     |
| BAV1_0139 | ND        | DET_0214 | ND     | coenzyme F420 hydrogenase/dehydrogenase beta subunit domain-like protein |
| BAV1_0138 | ND        | DET_0215 | ND     | polysaccharide biosynthesis protein                                      |
| ND        | cbdbA247  | DET_0240 | VS78   | tetrapyrrole methylase family protein                                    |
| ND        | cbdbA248  | DET_0241 | VS76   | radical SAM domain protein                                               |
| ND        | cbdbA249  | DET_0242 | VS75   | conserved hypothetical protein                                           |
| ND        | cbdbA250  | DET_0243 | VS74   | radical SAM domain protein                                               |
| ND        | cbdbA251  | DET_0244 | VS73   | ribonucleotide reductase cobalamin-dependent, NrdJ                       |
| ND        | cbdbA253  | DET_0245 | VS72   | cob(I)alamin adenosyltransferase, CobA                                   |
| ND        | cbdbA254  | DET_0246 | VS71   | cobalamin biosynthesis protein, CobD                                     |
| ND        | cbdbA255  | DET_0247 | VS70   | conserved hypothetical protein                                           |
| ND        | cbdbA257  | DET_0248 | VS69   | cysteine desulfurase                                                     |
| ND        | cbdbA258  | DET_0249 | VS68   | CbiZ-like protein                                                        |
| ND        | cbdbA259  | DET_0250 | VS76   | iron ABC transporter periplasmic iron binding protein, putative          |
| BAV1_0980 | cbdbA1081 | DET_1147 | ND     | ferric uptake regulator, Fur family                                      |
| ND        | ND        | DET_1148 | ND     | nitrogenase cofactor biosynthesis protein, NifB                          |
| ND        | ND        | DET_1149 | ND     | acetyltransferase GNAT family                                            |
| ND        | ND        | DET_1150 | ND     | ferredoxin, [2Fe2S]                                                      |
| ND        | ND        | DET_1151 | ND     | dinitrogenase iron molybdenum cofactor NifB Y X family protein           |
| ND        | ND        | DET_1152 | ND     | nitrogenase molybdenum iron protein beta subunit                         |
| ND        | ND        | DET_1153 | ND     | nitrogenase MoFe cofactor biosynthesis protein, NifE                     |
| ND        | ND        | DET_1154 | ND     | nitrogenase molybdenum iron protein, beta subunit NifK                   |
| ND        | ND        | DET_1155 | ND     | nitrogenase molybdenum iron protein, alpha chain, NifD                   |
| ND        | ND        | DET_1156 | ND     | nitrogen regulatory protein P II                                         |
| ND        | ND        | DET_1157 | ND     | nitrogen regulatory protein P II                                         |
| ND        | ND        | DET_1158 | ND     | nitrogenase iron protein, NifH                                           |
| ND        | ND        | DET_1159 | ND     | molybdenum ABC transporter ATP binding protein                           |
| ND        | ND        | DET_1160 | ND     | molybdenum ABC transporter permease protein modB                         |
| ND        | ND        | DET_1161 | ND     | molybdenum ABC transporter periplasmic molybdate binding protein, ModA   |
| ND        | ND        | DET_1162 | ND     | transcriptional regulator, putative                                      |
| ND        | ND        | DET_1174 | ND     | Fec type ABC transporter periplasmic iron binding protein                |
| ND        | ND        | DET_1175 | ND     | Fec type ABC transporter permease protein                                |
| ND        | ND        | DET_1176 | ND     | Fec type ABC transporter ATP binding protein                             |
| ND        | ND        | DET_1178 | ND     | transcriptional regulator MarR family                                    |
| BAV1_1291 | cbdbA1472 | DET_1501 | ND     | flavodoxin                                                               |
| ND        | cbdbA1593 | DET_1532 | VS1397 | dinitrogenase iron molybdenum cofactor family protein                    |
| BAV1_0218 | cbdbA181  | ND       | VS161  | L-threonine aldolase                                                     |
| BAV1_0238 | cbdbA155  | ND       | VS140  | L-alanine dehydrogenase                                                  |
| BAV1_0663 | cbdbB17   | ND       | ND     | oxidoreductase, molybdopterin binding                                    |
| BAV1_0939 | cbdbA1034 | ND       | VS928  | ABC transporter, ATPase subunit                                          |
| BAV1_0940 | cbdbA1036 | ND       | VS929  | ABC transporter, ATPase subunit                                          |
| BAV1_0941 | cbdbA1037 | ND       | VS930  | ABC transporter, cytoplasmic membrane component                          |
| BAV1_0942 | cbdbA1038 | ND       | VS931  | Nickel transporting ATPase                                               |
| BAV1_0943 | cbdbA1039 | ND       | VS932  | extracellular solute-binding protein family 5                            |
| BAV1_1054 | cbdbA1160 | ND       | VS1026 | arsenical resistance protein                                             |
| BAV1_1328 | cbdbA1667 | ND       | VS1458 | NAD dependent epimerase/dehydratase                                      |
| BAV1_1329 | cbdbA1668 | ND       | VS1459 | NAD dependent epimerase dehydratase                                      |
| ND        | cbdbA1568 | ND       | VS1369 | glutamate-ammonia ligase                                                 |
